# Supplementary material for: Synthesis, structure, and calf-thymus DNA binding of ternary fleroxacin–Cu(ii) complexes
Source: Royal Society of Chemistry journal article supplement (doi:10.1039/c6ra18971g), 2016-01-01
Supplement: c6ra18971g1.pdf [file c6ra18971g1.pdf]

## **Synthesis, structure, and calf-thymus DNA binding of ternary fleroxacin–Cu(II) complexes**

Ying Xiao, Kailin Xu, Qing Wang, Xinnuo Xiong, Yanmei Huang, Hui Li\*

College of Chemical Engineering, Sichuan University, Chengdu Sichuan, China.

E-mail: [lihuilab@sina.com](mailto:lihuilab@sina.com);

Fax: +86 028 85401207;

Tel: +86 028 85405149.

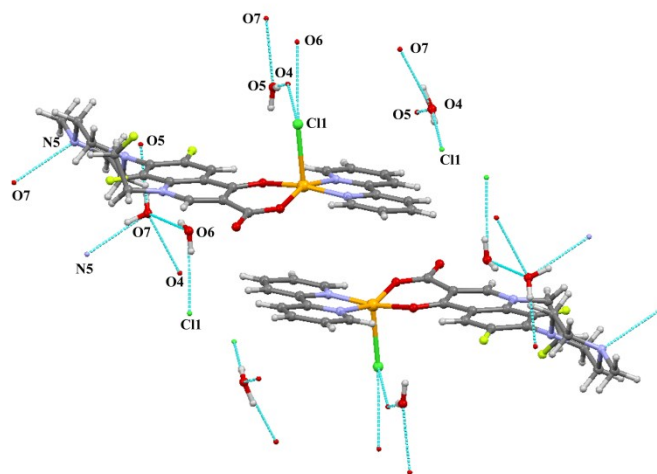

**Fig. S1.** Hydrogen bonds diagram of the complex 1.

**Table S1**

Hydrogen bonds for complex 1.

| D-H...A                  | d(D-H) | d(H..A) | d(D..A) | <DHA   |
|--------------------------|--------|---------|---------|--------|
| O5-H5A-F3 <sup>i</sup>   | 0.850  | 2.293   | 3.127   | 166.75 |
| O5-H5B-O4                | 0.850  | 1.813   | 2.660   | 174.66 |
| O6-H6A-Cl1 <sup>ii</sup> | 0.805  | 2.464   | 3.264   | 172.63 |
| O6-H6B-O7 <sup>iii</sup> | 0.831  | 2.100   | 2.898   | 160.89 |
| O4-H4A-C11               | 0.795  | 2.426   | 3.209   | 168.76 |
| O4-H4B-O7 <sup>iv</sup>  | 0.913  | 1.958   | 2.838   | 161.56 |
| O7-H7A-O5 <sup>v</sup>   | 0.850  | 1.983   | 2.820   | 168.44 |
| O7-H7B-N5                | 0.850  | 2.032   | 2.864   | 166.17 |

(i)  $x+1, y, z$ ; (ii)  $x, y-1, z$ ; (iii)  $-x+2, -y, -z$ ; (iv)  $-x+2, -y+1, -z$ ; (v)  $x, y-1, z$ .

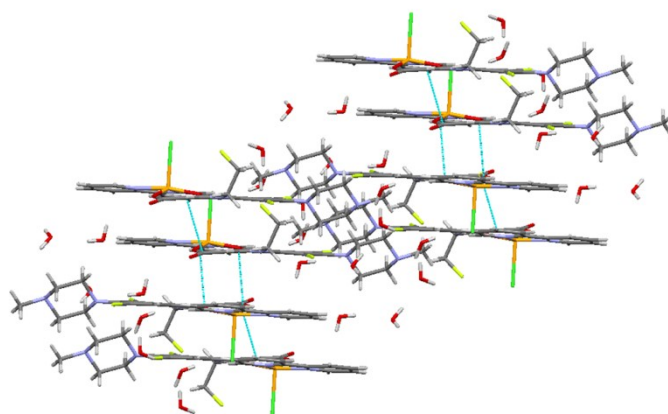

**Fig. S2.**  $\pi$ - $\pi$  stacking interactions between neighbouring bipy and flrx.

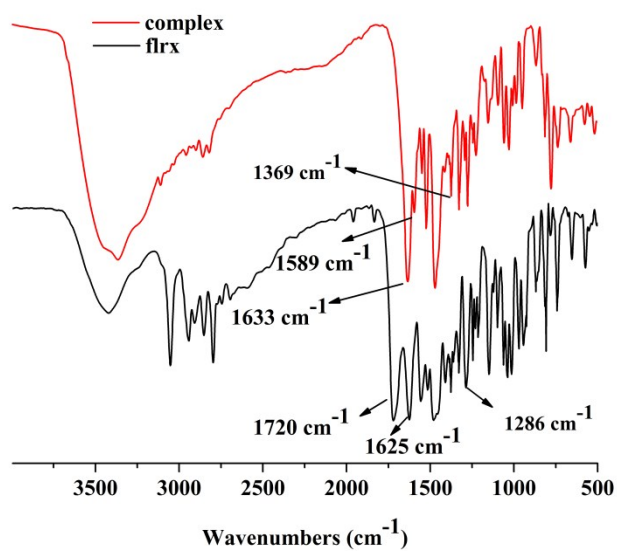

**Fig. S3.** FTIR spectra of flrx and the complex1.

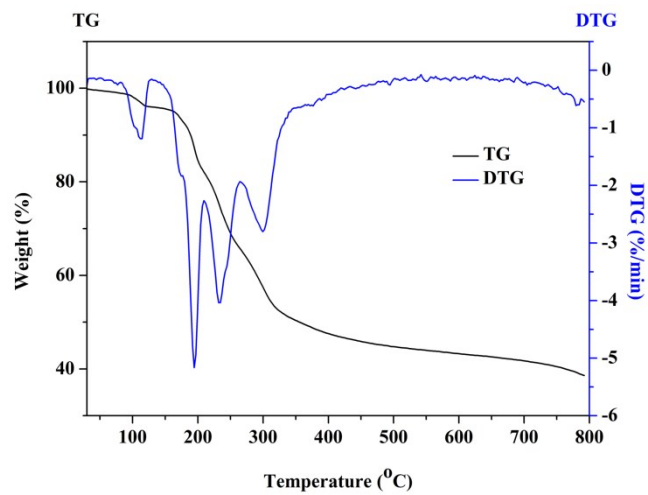

**Fig. S4.** TG and DTG curves of complex 1.

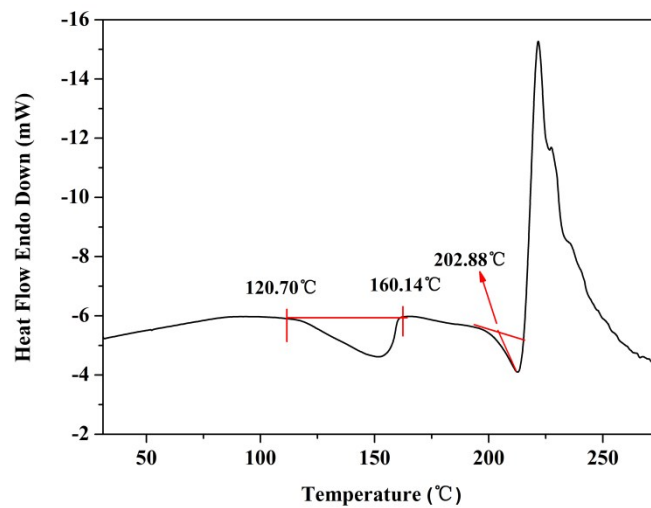

**Fig. S5.** DSC curve of complex 1.
